# Supplementary material for: Exosomal long noncoding RNA HOTTIP as potential novel diagnostic and prognostic biomarker test for gastric cancer
Source: PubMed Central journal article supplement (PMC6389063; doi:10.1186/s12943-018-0817-x), 2018-02-27

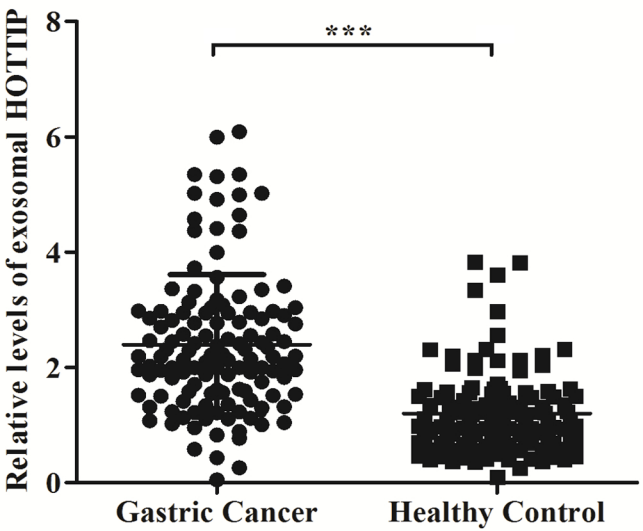

Supplement: 12943_2018_817_MOESM2_ESM.pdf [file 12943_2018_817_MOESM2_ESM.pdf]
