# Supplementary material for: Exosomal long noncoding RNA HOTTIP as potential novel diagnostic and prognostic biomarker test for gastric cancer
Source: PubMed Central journal article supplement (PMC6389063; doi:10.1186/s12943-018-0817-x), 2018-02-27
Supplement: 12943_2018_817_MOESM4_ESM.pdf [file 12943_2018_817_MOESM4_ESM.pdf]

**Table S1.** The sensitivity of biomarkers when the specificity was 95%

| Biological markers                  | Sensitivity(%) |
|-------------------------------------|----------------|
| Exosomal HOTTIP                     | 44.44          |
| CEA                                 | 19.84          |
| CA 19-9                             | 10.32          |
| CA 72-4                             | 29.37          |
| CEA+CA 19-9+CA 72-4                 | 39.68          |
| CEA+CA 19-9+CA 72-4+Exosomal HOTTIP | 55.56          |
