# Supplementary material for: Exosomal long noncoding RNA HOTTIP as potential novel diagnostic and prognostic biomarker test for gastric cancer
Source: PubMed Central journal article supplement (PMC6389063; doi:10.1186/s12943-018-0817-x), 2018-02-27
Supplement: 12943_2018_817_MOESM5_ESM.pdf [file 12943_2018_817_MOESM5_ESM.pdf]

**Table S2.** Univariate and multivariate analysis of clinicopathological parameters influencing prognosis

| Features                     | univariate analysis |             |                | multivariate analysis |             |                |
|------------------------------|---------------------|-------------|----------------|-----------------------|-------------|----------------|
|                              | HR                  | 95%CI       | <i>P</i> value | HR                    | 95%CI       | <i>P</i> value |
| Age                          | 1.127               | 0.711-1.785 | 0.611          |                       |             |                |
| Gender                       | 1.094               | 0.691-1.733 | 0.702          |                       |             |                |
| Tumor size                   | 1.072               | 0.678-1.697 | 0.765          |                       |             |                |
| Pathological differentiation | 1.173               | 0.733-1.876 | 0.507          |                       |             |                |
| Invasion depth               | 1.226               | 0.764-1.966 | 0.399          |                       |             |                |
| Lymph nodes metastasis       | 1.326               | 0.813-2.161 | 0.258          |                       |             |                |
| TNM stage                    | 2.000               | 1.225-3.264 | 0.006**        | 1.250                 | 0.655-2.385 | 0.499          |
| Exosomal HOTTIP              | 2.352               | 1.460-3.791 | <0.001***      | 2.037                 | 1.085-3.823 | 0.027*         |

HR, hazard ratio; CI, confidence interval. \* *P* <0.05, \*\* *P* <0.01, \*\*\* *P* <0.001.
